# Supplementary material
Source: HighWire-hosted journal article supplement (https://bmjopenquality.bmj.com/highwire/filestream/135895/field_highwire_adjunct_files/1/ds5323.xlsx)
Supplement: ds5323.xlsx [file ds5323.xlsx]

## Sheet: Sheet1
BASELINE DATA
1. NUMBER AND LOCATION OF NG TUBES
LOCATION	Ward 7	Ward 8	ITU	CCU	TOTAL
NUMBER OF INSERTIONS	8	3	1	1	13
2. Quality of whether guidelines were followed (score out of 3) - by ward									3. Quality of documentation (score out of 7) nurse and case notes									3. BASELINE DATA - Quality of documentation (score out of 7) case notes only
ID No	LOCATION	Indication	Placement Confirmed	No additional tests	Score		ID No	LOCATION	Indication	Insertion	Length	Nostril	Aspirate	Confirmation	Instructions	Score		Indication	Insertion	Length	Nostril	Aspirate	Confirmation	Instructions	Score
1	Ward 7	1	1	1	3		1	Ward 7	1	1	1	0	1	0	0	4		1	0	0	0	0	0	0	1
2	Ward 7	1	0	1	2		2	Ward 7	1	1	0	0	1	0	0	3		1	1	0	0	0	0	0	2
3	Ward 7	1	1	1	3		3	Ward 7	1	1	1	0	1	0	0	4		1	0	0	0	0	0	0	1
4	Ward 7	1	1	1	3		4	Ward 7	1	1	1	1	1	1	0	6		1	0	0	0	0	0	0	1
5	Ward 7	1	0	1	2		5	Ward 7	1	0	0	0	1	0	0	2		1	0	0	0	0	0	0	1
6	Ward 7	1	0	1	2		6	Ward 7	1	0	0	0	0	0	0	1		1	0	0	0	0	0	0	1
7	Ward 7	1	1	1	3		7	Ward 7	1	0	1	0	1	1	0	4		1	0	0	0	0	0	0	1
8	Ward 7	1	0	0	1		8	Ward 7	1	1	1	1	1	0	1	6		1	0	0	0	0	0	1	2
9	Ward 8	1	1	1	3		9	Ward 8	1	1	1	1	1	1	0	6		1	1	1	1	1	1	0	6
10	Ward 8	1	1	1	3		10	Ward 8	1	1	1	1	1	1	1	7		1	0	0	0	0	1	1	3
11	Ward 8	1	1	1	3		11	Ward 8	1	1	0	0	1	0	0	3		1	0	0	0	0	0	0	1
12	CCU	1	1	1	3		12	CCU	1	1	1	0	1	0	1	5		1	1	1	0	1	0	1	5
13	ITU	1	0	1	2		13	ITU	1	0	0	0	0	0	0	1		1	0	0	0	0	0	0	1
TOTAL		13	8	12			TOTAL		13	9	8	4	11	4	3			13	3	2	1	2	2	3
Percentage		1	0.615385	0.923077			Percentage		1	0.692308	0.615385	0.307692	0.846154	0.307692	0.230769			1	0.230769	0.153846	0.0769231	0.153846	0.153846	0.230769
8/13 (62%) scored 3/3							Average score Nurse and Case notes	4
							Average Score Case notes only	2
							0% scored 7/7
PDSA Cycle 1
1. NG tube insertions (by ward) each week
Week	Ward 5	Ward 7	Ward 8	Ward 9	ITU	Ward 1	CCU	Total
1	0	1	1	0	0	0	0	2
2	0	2	1	1	3	0	0	7
3	0	0	2	0	1	0	0	3
4	0	3	0	0	0	0	0	3
5	0	4	0	0	0	0	0	4
6	2	7	0	0	0	0	0	9
7	0	2	0	0	0	0	0	2
8	0	1	0	0	0	0	0	1
9	0	1	0	0	1	0	0	2
10	0	3	0	0	1	2	0	6
11	1	2	1	1	0	0	0	5
12	0	2	0	1	1	0	0	4
13	0	1	0	0	0	0	0	1
							TOTAL	49
2. Quality of following guidelines (out of 3)
Week	Number	Ward	Indication	Confirmed	No additional tests	Score
1	1	8	1	1	1	3
1	2	7	1	1	1	3
2	3	7	1	1	0	2
2	4	8	1	1	1	3
2	5	ITU	1	1	1	3
2	6	7	1	1	1	3
2	7	9	1	0	0	1
2	8	ITU	1	1	1	3
2	9	ITU	1	1	1	3
3	10	8	1	1	1	3
3	11	8	1	1	1	3
3	12	ITU	1	1	1	3
4	13	7	1	1	1	3
4	14	7	1	0	0	1
4	15	7	1	1	1	3
5	16	7	1	1	1	3
5	17	7	1	0	1	2
5	18	7	1	1	1	3
5	19	7	1	1	1	3
6	20	7	1	0	1	2
6	21	7	1	1	1	3
6	22	7	1	1	1	3
6	23	7	1	0	0	1
6	24	5	0	0	0	0
6	25	5	0	1	1	2
6	26	7	1	1	1	3
6	27	7	1	0	0	1
6	28	7	1	1	1	3
7	29	7	1	1	1	3
7	30	7	1	0	1	2
8	31	7	1	0	1	2
9	32	7	1	1	1	3
9	33	ITU	0	1	1	2
10	34	ITU	1	1	1	3
10	35	7	1	1	1	3
10	36	1	1	0	0	1
10	37	7	1	1	1	3
10	38	7	1	1	1	3
10	39	1	0	0	1	1
11	40	5	1	0	0	1
11	41	7	1	1	1	3
11	42	8	0	0	0	0
11	43	7	0	1	1	2
11	44	9	1	1	1	3
12	45	9	1	1	1	3
12	46	7	1	1	1	3
12	47	7	1	0	0	1
12	48	ITU	1	0	0	1
13	49	7	1	1	1	3
3. Quality of Documentation (score out of 7)
				Combined notes									Case notes alone
Week	Number	Ward		Indication	Insertion	Length	Nostril	Aspirate	Confirmation	Instructions	Score		Indication	Insertion	Length	Nostril	Aspirate	Confirmation	Instructions	Score
1	1	8		1	1	0	0	1	1	1	5		1	1	0	0	1	1	1	5
1	2	7		1	1	1	0	1	1	0	5		1	0	0	0	0	1	0	2
2	3	7		1	1	1	1	1	1	0	6		1	0	0	0	0	0	0	1
2	4	8		1	1	0	0	1	1	1	5		1	0	0	0	0	1	1	3
2	5	ITU		1	1	0	0	0	0	0	2		1	1	0	0	0	0	0	2
2	6	7		1	1	1	0	1	1	0	5		1	0	0	0	0	0	0	1
2	7	9		1	1	0	0	1	0	1	4		1	1	0	0	1	0	1	4
2	8	ITU		1	0	0	0	0	0	0	1		1	0	0	0	0	0	0	1
2	9	ITU		1	1	0	0	1	0	0	3		1	0	0	0	0	0	0	1
3	10	8		1	1	0	1	1	1	1	6		1	1	0	1	1	1	1	6
3	11	8		1	1	1	1	1	0	0	5		1	0	0	0	0	0	0	1
3	12	ITU		1	0	0	0	1	0	1	3		1	0	0	0	0	0	1	2
4	13	7		1	1	1	1	1	0	1	6		1	0	0	0	0	0	1	2
4	14	7		1	1	0	0	1	0	0	3		1	0	0	0	0	0	0	1
4	15	7		1	1	1	0	1	1	0	5		0	0	0	0	0	0	0	0
5	16	7		1	1	1	0	1	0	0	4		1	1	1	0	1	0	0	4
5	17	7		1	1	1	0	1	0	0	4		1	0	0	0	0	0	0	1
5	18	7		1	1	0	0	1	0	0	3		1	0	0	0	0	0	0	1
5	19	7		1	1	1	0	1	1	0	5		1	0	0	0	0	0	0	1
6	20	7		1	1	1	0	1	0	0	4		1	0	0	0	0	0	0	1
6	21	7		1	1	0	0	1	1	0	4		1	0	0	0	0	0	0	1
6	22	7		1	1	1	0	1	0	1	5		1	0	0	0	0	1	1	3
6	23	7		1	1	0	0	1	0	0	3		1	0	0	0	0	0	0	1
6	24	5		0	0	1	0	0	1	1	3		0	0	0	0	0	0	1	1
6	25	5		0	1	0	0	1	1	1	4		0	0	0	0	0	0	0	0
6	26	7		1	1	0	0	1	1	0	4		1	0	0	0	0	0	0	1
6	27	7		1	1	0	0	1	0	0	3		1	0	0	0	0	0	0	1
6	28	7		1	1	0	0	1	0	0	3		1	0	0	0	0	0	0	1
7	29	7		1	0	0	0	1	1	0	3		1	0	0	0	0	0	0	1
7	30	7		1	1	0	0	1	0	0	3		1	0	0	0	0	0	0	1
8	31	7		1	1	0	0	1	0	0	3		1	0	0	0	0	0	0	1
9	32	7		1	1	1	1	1	0	1	6		1	0	0	0	0	0	1	2
9	33	ITU		0	1	1	1	1	0	0	4		0	0	0	0	0	0	0	0
10	34	ITU		1	1	1	0	1	0	0	4		1	0	0	0	0	0	0	1
10	35	7		1	1	1	1	1	0	0	5		1	0	0	0	0	0	0	1
10	36	1		1	0	0	0	0	0	0	1		1	0	0	0	0	0	0	1
10	37	7		1	1	1	0	1	1	0	5		1	0	0	0	0	0	0	1
10	38	7		1	1	0	0	1	0	1	4		1	0	0	0	0	0	1	2
10	39	1		0	1	0	0	0	0	1	2		0	1	0	0	0	0	1	2
11	40	5		1	1	0	0	0	1	0	3		1	1	0	0	0	1	0	3
11	41	7		1	1	1	0	1	0	1	5		1	0	0	0	0	0	0	1
11	42	8		0	1	1	1	0	1	1	5		0	1	1	1	0	1	1	5
11	43	7		0	1	1	0	1	1	0	4		0	0	0	0	0	0	0	0
11	44	9		1	1	0	1	1	0	0	4		1	1	0	1	1	0	0	4
12	45	9		1	0	0	0	1	0	0	2		1	0	0	0	0	0	0	1
12	46	7		1	1	1	1	1	0	0	5		1	0	0	0	0	0	0	1
12	47	7		1	1	1	1	1	0	0	5		1	0	0	0	0	0	0	1
12	48	ITU		1	0	0	0	0	0	0	1		1	0	0	0	0	0	0	1
13	49	7		1	1	1	0	1	1	0	5		1	0	0	0	0	0	0	1
PDSA Cycle 2-6
1. NG tube insertions each week - Ward 7
Week	Number of insertions
1	2
2	5
3	1
4	0
5	4
6	0
2. Quality of following guidelines (out of 3)
Week	Number		Indication	Confirmed	No additional tests	Score
1	1		1	1	1	3
1	2		0	1	1	2
2	3		1	1	1	3
2	4		1	1	1	3
2	5		1	1	1	3
2	6		1	1	1	3
2	7		0	1	1	2
3	8		1	1	1	3
5	9		1	1	1	3
5	10		1	1	1	3
5	11		1	1	1	3
5	12		1	1	1	3
3. Quality of Documentation (score out of 7)
				Combined notes									Case notes alone
Week	Number			Indication	Insertion	Length	Nostril	Aspirate	Confirmation	Instructions	Score	STICKER?	Indication	Insertion	Length	Nostril	Aspirate	Confirmation	Instructions	Score	Proforma
1	1			1	1	1	1	1	0	0	5	n	1	0	0	0	0	0	0	1	n
1	2			0	1	1	0	1	1	1	5	n	0	0	0	0	0	0	0	0	n
2	3			1	1	1	1	1	1	1	7	y	0	0	0	0	0	0	0	0	Proforma not filed
2	4			1	1	1	1	1	1	1	7	y	1	0	0	0	0	0	0	1	Proforma not filed
2	5			1	1	1	1	1	1	1	7	y	1	0	0	0	0	0	0	1	Proforma not filed
2	6			1	1	1	1	1	1	1	7	y	1	1	1	1	1	1	1	7	y
2	7			0	1	0	1	1	1	1	5	n	0	0	0	0	1	1	1	3	Proforma not filled correctly
3	8			1	1	1	1	1	1	1	7	n	1	1	1	1	1	1	1	7	y - fluroscopic insertion
5	9			1	1	1	1	1	0	0	5	n	1	0	0	0	0	0	0	1	n
5	10			1	1	1	0	1	1	1	6	y	1	1	1	0	1	1	1	6	y
5	11			1	1	1	1	1	1	0	6	n	1	0	0	0	0	0	0	1	n
5	12			1	1	0	0	1	0	0	3	y	1	0	0	0	0	0	0	1	Proforma not filed
